# Supplementary material for: Blood clotting behavior is innately modulated in Ursus Americanus during early and late denning relative to summer months
Source: Oxford University Press journal article supplement (doi:10.1242/jeb.141549), 2016-01-01
Supplement: jeb141549supp.pdf [file jeb141549supp.pdf]

Table S1. Activated clotting times (ACTs), Activated partial thromboplastin times (aPTTs), Prothrombin times (PTs), and D-dimer levels in American Black Bears

| Summer        | Bear # | Sex  | Captive/<br>Wild | Weight (lb) | Temp (°F)    | ACT (sec) | aPTT         | PT           | D-Dimer        |
|---------------|--------|------|------------------|-------------|--------------|-----------|--------------|--------------|----------------|
| Summer        | 1012   | F    | Captive          | 380         | 98.7         | 67        | 18.2         | 8.4          | Not Analyzed   |
|               | 1010   | F    | Captive          | 290         | 100.0        | 89        | 17.1         | 8.8          | Not Analyzed   |
|               | 1013   | F    | Captive          | 278         | 98.4         | 86        | ERR          | ERR          | Not Analyzed   |
| Early-Denning | Bear # | Sex  | Captive/<br>Wild | Weight (lb) | Temp (°F)    | ACT (sec) | aPTT         | PT           | D-Dimer        |
|               | 2079   | F    | Wild             | 348         | 93.4         | 202       | 33.2         | 6.9          | 548 (pregnant) |
|               | 2081   | F    | Wild             | 271         | 97.5         | 274       | 31.3         | 6.1          | 202            |
|               | 4011   | F    | Wild             | 237         | 96.2         | 197       | 29.2         | 6.8          | 103            |
|               | 4061   | F    | Wild             | 211         | Not Analyzed | 235       | 23.8         | 7.0          | 122            |
|               | 4067   | F    | Wild             | 301         | 96.7         | 178       | 27.8         | 6.3          | 182            |
|               | 4087   | F    | Wild             | 296         | 98.3         | 234       | 46.7         | 10.4         | 200            |
|               | 4101   | F    | Wild             | 70          | 97.2         | 235       | 23.8         | 6.7          | 98             |
|               | 4114   | F    | Wild             | 94          | Not Analyzed | 178       | Not Analyzed | Not Analyzed | 122            |
|               | 4021   | F    | Wild             | 165         | Not Analyzed | 234       | 21.8         | 8.6          | 180            |
|               | 4064   | F    | Wild             | 262         | 96.1         | 202       | ERR          | 9.2          | 150 (pregnant) |
| Late-Denning  | Bear # | Sex  | Captive/<br>Wild | Weight (lb) | Temp (°F)    | ACT (sec) | aPTT         | PT           | D-Dimer        |
|               | 2079   | F    | Wild             | 290         | 94.2         | 193       | 21.2         | 5.3          | 520 (cubs)     |
|               | 2149   | F    | Wild             | 96          | 93.4         | 206       | 26.6         | 6.2          | 151            |
|               | 2081   | F    | Wild             | 236         | 92.5         | 144       | 24.8         | 5.4          | 150            |
|               | 4011   | F    | Wild             | 220         | 93.1         | 235       | 25.7         | 9.5          | 115            |
|               | 4061   | F    | Wild             | 176         | 95           | 146       | 23.7         | 6.1          | 152            |
|               | 4067   | F    | Wild             | 230         | 97.5         | 141       | 23.8         | 10.8         | 78             |
|               | 4087   | F    | Wild             | 253         | 94.5         | 146       | 21.9         | 10.2         | 75             |
|               | 4114   | F    | Wild             | 49          | 92.5         | 136       | 27.5         | 9.6          | 147            |
|               | 3002   | F    | Wild             | 120         | 95.5         | 141       | 27.2         | 6.5          | 119            |
|               | 4021   | F    | Wild             | 229         | Not Analyzed | 144       | 22.5         | 9.7          | Not Analyzed   |
| 4064          | F      | Wild | 209              | 93.2        | 170          | 24.9      | 9.8          | 200 (cubs)   |                |

ERR indicates an error in the testing and Not Analyzed indicates that either a measurement was not taken or there was not enough plasma to conduct the diagnostic test.
